# Supplementary material for: OryzaGenome2.1: Database of Diverse Genotypes in Wild Oryza Species
Source: PubMed Central journal article supplement (PMC7933306; doi:10.1186/s12284-021-00468-x), 2021-03-04
Supplement: 12284_2021_468_MOESM4_ESM.pdf [file 12284_2021_468_MOESM4_ESM.pdf]

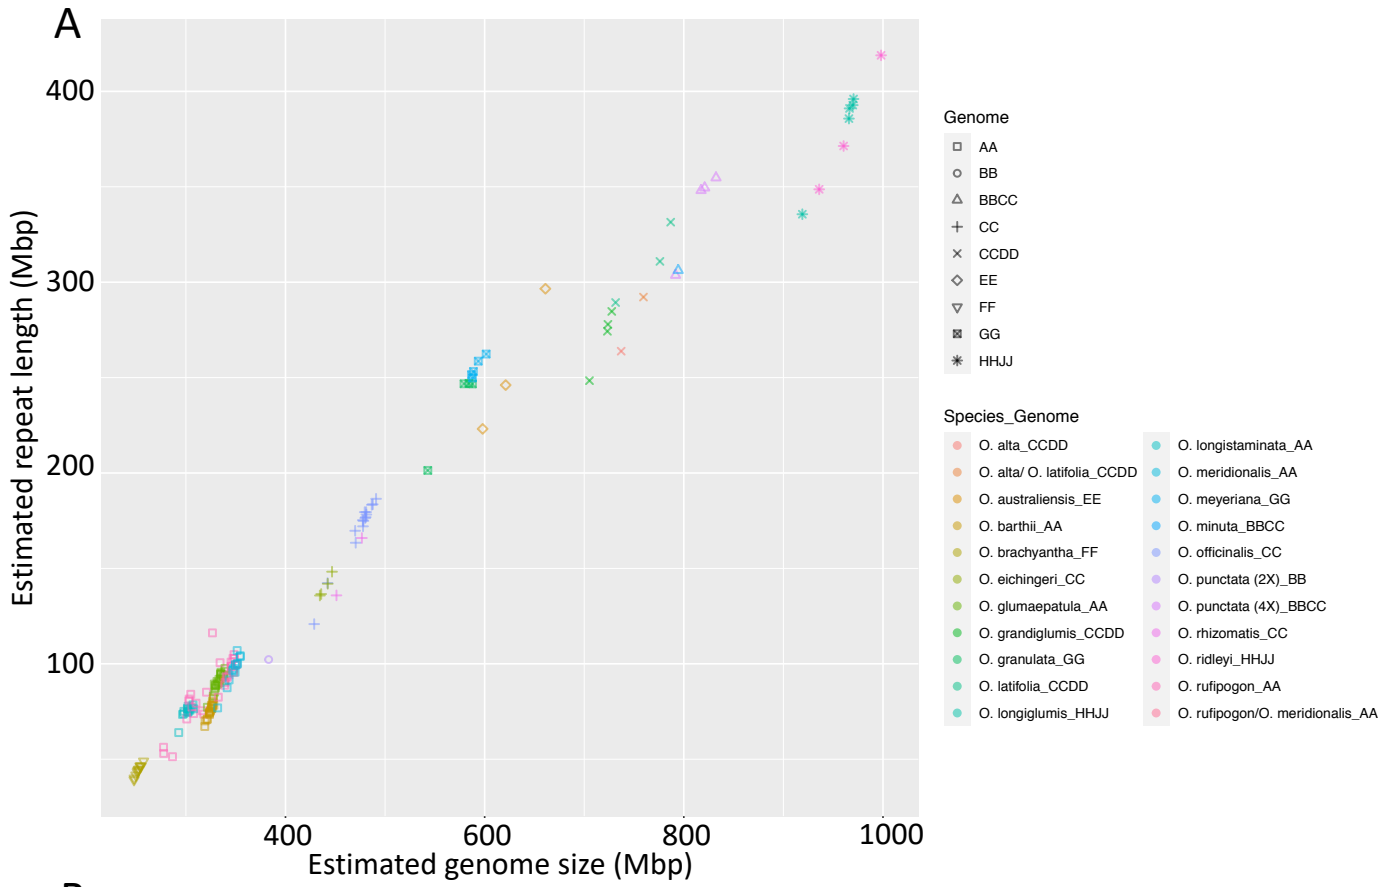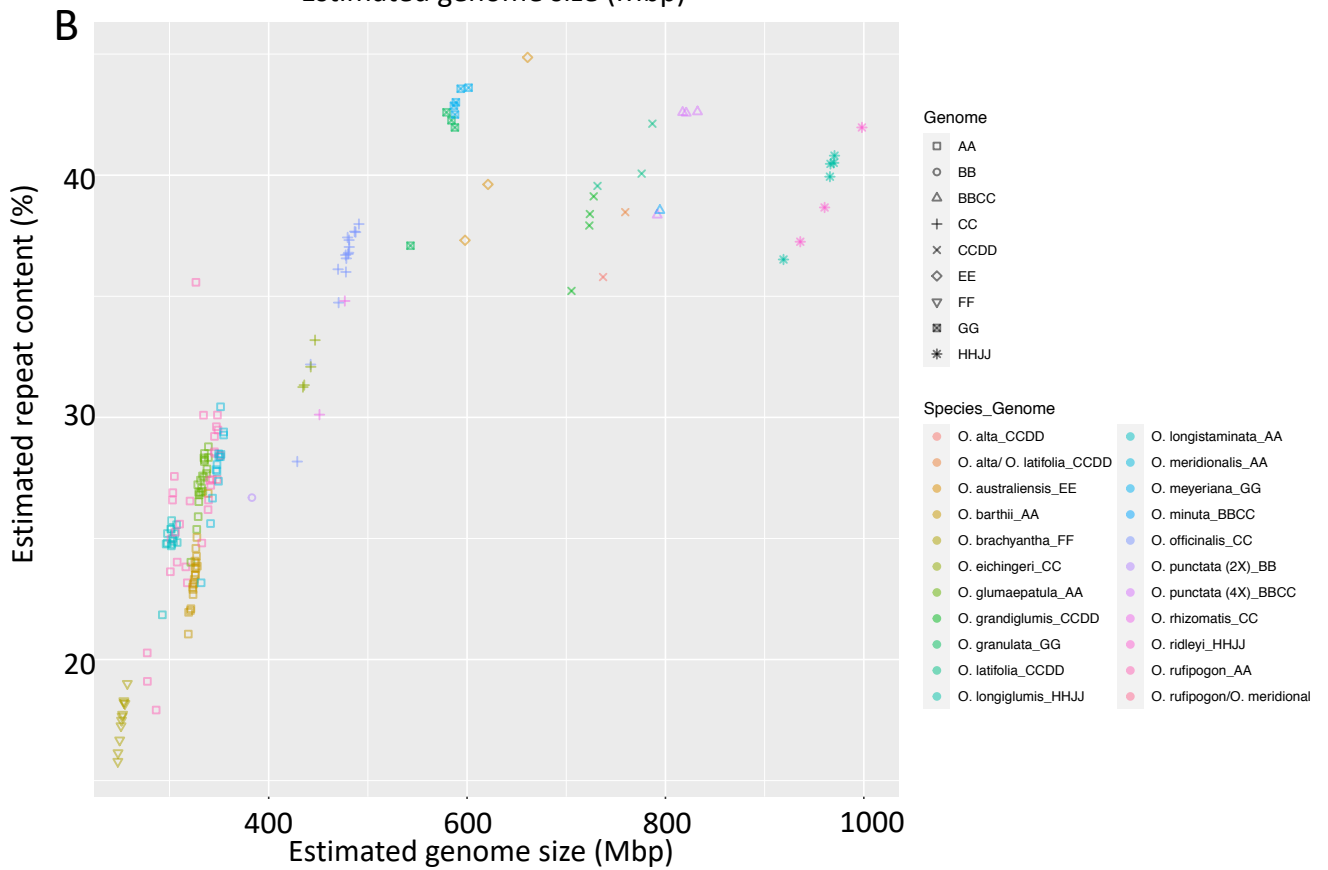

**Supplementary Figure 1. Analysis of genome diversity among genus *Oryza*.**

A. A plot of estimated genome size and estimated repeat length among genus *Oryza*.

B. A plot of estimated genome size and estimated repeat content among genus *Oryza*.
